# Supplementary material for: A unified model for microtubule rescue
Source: PubMed Central journal article supplement — Mol Biol Cell. 2019 Mar 15;30(6):753–65. doi: 10.1091/mbc.E18-08-0541 (PMC6589779; doi:10.1091/mbc.e18-08-0541), 2019-03-15
Supplement: mbc-30-753-s001.pdf [file mbc-30-753-s001.pdf]

# Supplemental Materials

*Molecular Biology of the Cell*

Fees and Moore

## Supplemental Figure 1)

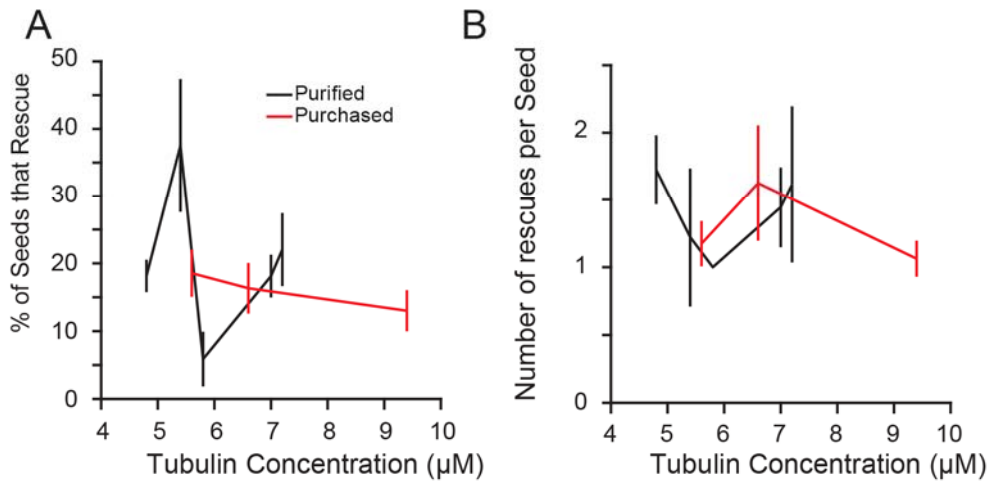

### Supplemental Figure 1)

**(A)** Percent of seeds with at least one observed rescue as a function of tubulin concentration. Protein purified from pig brain (black) compared to purchased protein purified commercially (red). Data points represent mean  $\pm$  95% CI of 870 separate GMPCPP seeds from 8 different experiments. **(B)** Average number of rescues per seed as a function of tubulin concentration.

## Supplemental Figure 2

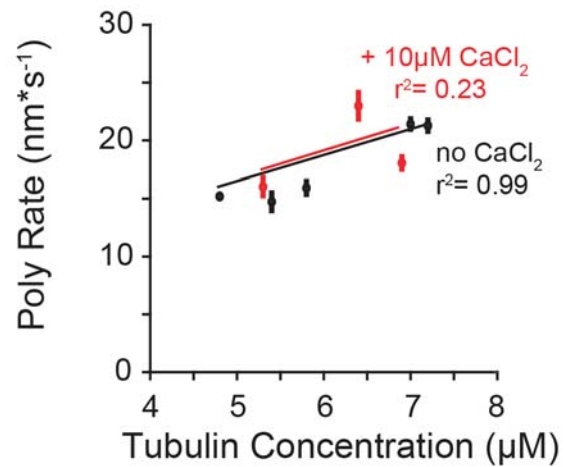

### Supplemental Figure 2)

**(A)** Polymerization rate as a function of tubulin concentration of reactions with (red) or without (black) 10 μM CaCl<sub>2</sub>. Points represent average microtubule polymerization rate at each concentration. Plot represents the mean ± 95% CI. Data pooled from at least 62 microtubules from at least 3 separate experiments of increasing tubulin concentrations.
